# Supplementary material
Source: publisher figshare collection journal article supplement (https://frontiersin.figshare.com/ndownloader/files/13866044)
Supplement: Supplementary file 1 [file 13866044]

Supplementary Material

MyShake: Using Human-Centered Design Methods to Promote Engagement in a Smartphone-based Global Seismic Network

Kaylin Rochford, Jennifer Strauss*, Qingkai Kong, Richard Allen

*** Correspondence:** Corresponding Author: jastrauss@berkeley.edu

# User Interview Script

Interview location:

Mindset

- When you think about earthquakes, what are some of the thoughts that first come to mind?
  - Why is that your reaction?

- How often do you think about the impact that a large earthquake might have on you?
  - What made you think about that?

- What aspects of your life would be most impacted?

Resources + Preparation

- What are some resources that you use to learn about earthquakes?
  - For each: why do you use it, how often?

- Describe any steps that you’ve taken to prepare for future earthquakes.
  - Why or why not?

Experience

- Have you experienced an earthquake? What did you do?

- How do you get information immediately after the earthquake?

- What is the information you are looking for?  Did you find it?

Product

- Have you heard of Earthquake Early Warning?
  - If yes, how would you describe it in your own words?
- Is 10 second warning useful?
- What would you do?
- EEW will never be perfect, would you prefer to occasionally get an alert when you do not feel shaking, or get fewer alerts and sometimes feel shaking but not get an alert.
- If you have EEW, what information would you want to receive?

- Would you be willing to download a mobile app that would use data about your phone’s movement to help create EEW?
  - How do you feel about sharing information from your phone?
- If we provide a map immediately after and earthquakes showing the strength of shaking and damage
  - Is there any other information you would like?
  - Would you trust anonymous damage reports?

- We are developing an app that could provide EEW and damage maps
  - What other features would you like?
  - What would motivate you to keep the app on your phone given that earthquakes are infrequent?

Demographic Questions

- Age (or a general range if you prefer not to say)
- Gender identification
- Occupation
- City and country of residence
- Homeowner?
- Marital Status? Children?
